1 Genome-wide associations reveal human-mouse genetic convergence and  
2 novel modifiers of myogenesis, *CPNE1* and *STC2*

3

4 Authors

5 **Ana I. Hernandez Cordero<sup>1</sup>, Natalia M. Gonzales<sup>3</sup>, Clarissa C. Parker<sup>5</sup>, Greta Sokoloff<sup>10</sup>,**  
6 **David J. Vandenberg<sup>9</sup>, Riyan Cheng<sup>6</sup>, Mark Abney<sup>3</sup>, Andrew Skol<sup>4</sup>, Alex Douglas<sup>2</sup>, Abraham**  
7 **A. Palmer<sup>7,8</sup>, Jennifer S. Gregory<sup>1</sup>, and Arimantas Lionikas<sup>1\*</sup>**

8 Affiliations:

- 9 1. School of Medicine, Medical Sciences and Nutrition, College of Life Sciences and Medicine,  
10 University of Aberdeen, Aberdeen, UK
- 11 2. Institute of Biological and Environmental Sciences, University of Aberdeen, Aberdeen,  
12 AB24 3FX, UK
- 13 3. Department of Human Genetics, University of Chicago, Chicago, IL 60637, USA
- 14 4. Department of Medicine, University of Chicago, Chicago, IL 60637, USA
- 15 5. Department of Psychology and Program in Neuroscience, Middlebury College, Middlebury,  
16 VT 05753, USA
- 17 6. Department of Health Sciences, University of California San Diego, La Jolla, CA 92093,  
18 USA
- 19 7. Department of Psychiatry, University of California San Diego, La Jolla, CA 92093, USA
- 20 8. Institute for Genomic Medicine, University of California San Diego, La Jolla, CA 92093,  
21 USA
- 22 9. Department of Biobehavioral Health, Penn State Institute for the Neurosciences, &  
23 Molecular, Cellular & Integrative Sciences Program. The Pennsylvania State University,  
24 University Park, PA 16802

25 10. Department of Psychological and Brain Sciences, The University of Iowa, Iowa City, IA

26 52242

27

28 \*Corresponding Author: Dr. Arimantas Lionikas, e-mail: [a.lionikas@abdn.ac.uk](mailto:a.lionikas@abdn.ac.uk)

## 29 Abstract

30 Muscle bulk in adult healthy humans is highly variable even after accounting for height, age and  
31 sex. Low muscle mass, due to fewer and/or smaller constituent muscle fibres, would exacerbate  
32 the impact of muscle loss occurring in aging or disease. Genetic variability substantially influences  
33 muscle mass differences, but causative genes remain largely unknown. In a genome-wide  
34 association study (GWAS) on appendicular lean mass (ALM) in a population of 95,545 middle-age  
35 (37-48 years) individuals from the UK Biobank we found 125 loci associated with ALM ( $P < 5 \times 10^{-8}$ ).  
36 We replicated associations for 64% of these loci ( $P < 5 \times 10^{-8}$ ) with ALM in a population of 193,688  
37 elderly (65-74 years) individuals. We also conducted a GWAS on skeletal muscle mass of 1,867  
38 mice from the LGSM advanced intercross line and found 23 quantitative trait loci. Five loci and nine  
39 positional candidates overlapped between the two species. *In vitro* studies of potential candidates  
40 identified *CPNE1* and *STC2* genes as novel modifiers of myogenesis. Collectively, these findings  
41 shed new light on the genetics of muscle mass variability in humans and identified new targets for  
42 the development of interventions preventing muscle loss. The overlapping genes between humans  
43 and the mouse model will facilitate understanding of the cellular mechanisms underlying muscle  
44 variability.

## 45 Introduction

46 Skeletal muscle plays key roles in locomotion, respiration, thermoregulation, maintenance  
47 of glucose homeostasis and protection of bones and viscera. The loss of muscle due to aging,  
48 known as sarcopenia, affects mobility and can lead to frailty and deterioration of quality of life<sup>1</sup>. The  
49 risk of disability is 1.5 to 4.6 times higher in the sarcopenic elderly than in the age matched  
50 individuals with normal muscle mass<sup>2</sup>. However, lean mass, a non-invasive proxy for muscle mass,  
51 differs by more than two-fold between healthy adult individuals of same sex, age and height<sup>3</sup>.  
52 Therefore, we hypothesize that differential accretion of muscle mass by adulthood may influence  
53 the risk of sarcopenia and frailty later in life.

54 Genetic factors contribute substantially to the variability in lean mass in humans, with  
55 heritability estimates of 40 – 80 %<sup>4</sup>. A continuous distribution of the trait and data obtained from  
56 animal models<sup>5-7</sup> indicates a polygenic causality. However, thus far, genome-wide association  
57 studies (GWAS) have implicated fewer than a dozen genes, explaining only a small fraction of this  
58 heritability<sup>8; 9</sup>. A limited sample size in early studies<sup>10-14</sup> and the effects of confounders such as  
59 subject age<sup>8</sup>, size of the skeleton and composition of lean mass have hindered detection of genes.  
60 The UK Biobank is a resource of demographic, phenotypic and genotypic data collected on  
61 ~500,000 individuals<sup>15</sup>. It includes the arm and leg lean mass, body composition and morphometric  
62 information, providing a model for improving our understanding of the genetic basis for variability in  
63 muscle mass. Skeletal muscle mass, however, changes over the course of individual's lifespan. It  
64 reaches a peak around mid-twenties and remains largely stable through mid-fourties, before  
65 succumbing to gradual decline, which accelerates after about 70 years of age<sup>16</sup>. There is a  
66 substantial degree of individual variability in the slope of muscle change across both the increasing  
67 and decreasing phases of the lifespan trajectory<sup>17</sup>. Both the trajectory itself and the slope of  
68 individual variability may impede identification of genes.

69 The indirect estimates of lean mass impose limitations because muscle mass is not an  
70 exclusive contributor to this variable. Furthermore, the cellular basis of variability in muscle mass  
71 (i.e. if it is caused by the differences in the number of constituent muscle fibres, their size, or both)  
72 remains completely latent. Using the laboratory mouse circumvents a number of those limitations.

73 The mouse shares approximately 90% of the genome with humans<sup>18</sup>, and permits analyses of  
74 traits not amenable in humans, such as muscle mass<sup>6; 7; 19</sup> and muscle fibre characteristics<sup>20; 21</sup>.  
75 The phenotypic differences between the LG/J and SM/J mouse strains make them particularly  
76 attractive for complex trait analyses<sup>22-24</sup>. LG/J mice were selected for large body size<sup>25</sup>, while SM/J  
77 mice were selected for small body size<sup>26</sup>. The F<sub>2</sub> intercross derived from the LG/J and SM/J strains  
78 (LGSM)<sup>6; 27</sup> and an advanced intercross line (AIL) of the LGSM (LGSM AIL) developed using a  
79 breeding strategy proposed by Darvasi and Soler<sup>28</sup>, led to multiple quantitative trait loci (QTLs) for  
80 muscle mass<sup>6; 27</sup>. However, these QTLs still encompass tens or even hundreds of genes and  
81 require further prioritising. We hypothesized that the detection power of a modest sample size of  
82 the LGSM AIL and the superior resolution of a human cohort will facilitate identification of the  
83 quantitative trait genes (QTGs) underlying muscle QTLs.

84 The aim of this study was to identify the genomic loci and the underlying genes for  
85 variability in skeletal muscle mass and to assess their effects in the elderly. We addressed this in  
86 three stages: (1) we conducted a GWAS in a human cohort of middle-aged individuals from the UK  
87 Biobank, and tested the effect of the identified set of loci in an elderly cohort; (2) we conducted a  
88 GWAS on hindlimb muscle mass in a population of LGSM AIL mice. (3) In the final stage, we  
89 nominated candidate genes by comparing mouse and human loci and validated the myogenic role  
90 of selected candidates *in vitro*.

## 91 Methods

### 92 Stage one: Genome mapping in human populations

#### 93 UK Biobank cohort

94 The population in this study consisted of 316,589 adult individuals of 37 to 74 years of age  
95 (project ID: 26746). We drew this cohort from the UK Biobank (UKB) project<sup>15</sup>; all participants  
96 recruited were identified from the UK National Health Service (NHS) records and attended a  
97 baseline visit assessment between 2006 and 2010. During the assessment, participants gave  
98 written consent, answered a questionnaire, and were interviewed about their health and lifestyle.

99 Blood samples and anthropometric measurements were collected from each participant.

100 Assessments were conducted at 22 facilities in Scotland, England, and Wales.

101 We divided the sample into middle-aged and elderly cohorts. The middle-aged cohort  
102 consisted of 99,065 adults ranging from 37 to 48 years of age; these individuals were not affected  
103 by sarcopenia. We excluded 3,520 participants that were reported to be ill with cancer, pregnant,  
104 or had undergone a leg amputation procedure, as well as individuals with discordant genetic sex  
105 and self-reported sex records. We retained a total of 95,545 adult individuals (51,394 females and  
106 44,151 males) for further analyses.

107 The elderly cohort consisted of 217,524 adults ranging from 63 to 74 years of age. We  
108 selected this cohort to test if the effect of the genetic variants identified on middle-aged individuals  
109 could also influenced phenotypes later in life. We excluded 23,836 individuals based on the same  
110 criteria used for the middle-aged cohort. After exclusions, the elderly cohort included 193,688  
111 individuals of 63 to 74 years of age (100,463 females and 93,225 males) (Table S1).

112

## 113 UK biobank traits

114 We used the data for standing height (UKB field ID: 50), sitting height (UKB field ID:  
115 20015), whole body fat (UKB field ID: 23100), arm lean mass (UKB field ID: 23121 and 23125),  
116 and leg lean mass (UKB field ID: 23113 and 23117) measured as part of the UK Biobank project.  
117 Body composition measurements were taken using bioelectric impedance. We calculated leg  
118 length by subtracting sitting height from standing height (all measurements were recorded in cm).  
119 Because lean mass in the limbs primarily consists of skeletal muscle tissue, we used ALM as a  
120 proxy for muscle mass. We calculated ALM as the sum of the muscle mass of two arms and two  
121 legs. We checked that all traits were normally distributed by examining the QQ-plot and histogram  
122 of residuals from a simple linear model that included sex as a covariate. Residuals were normally  
123 distributed and we did not transform any of the traits.

124

## 125 UK biobank genotypes

126 We obtained genotype data for all participants from the UKB v3 genotypes release<sup>29</sup>, which  
127 includes genotype calls from the Affymetrix UK BiLEVE Axiom array and the Affymetrix UK  
128 Biobank Axiom array. IMPUTE2<sup>29</sup> was used to impute genotypes from the UK10K and 1000  
129 Genomes Phase 3 reference panels<sup>30</sup>, as described by Brycroft *et al*<sup>29</sup>. We kept all imputed  
130 genotype data (93,095,624 genetic variants (SNPs, Indels and structural variants)) for subsequent  
131 analyses in order to capture the effects of both common (MAF > 0.001) and rare variants (MAF <  
132 0.001). The software (BOLT-LMM v2.3.2)<sup>31</sup> we used to perform GWAS was developed for large  
133 data sets (i.e.: UK Biobank cohort) and it was only tested for human cohorts, which have different  
134 LD patterns from animals. For these two reasons, we used BOLT-LMM v2.3.2 for the analyses of  
135 human data only. Although we mainly focused on reporting the effects of common variants, we  
136 also reported rare variants associated with ALM as a supplemental table (Table S4).

137

## 138 Appendicular lean mass GWAS

139 We used BOLT-LMM (v2.3.2)<sup>32</sup> to perform a GWAS for ALM in the middle-aged cohort. The  
140 linear mixed model (LMM) approach implemented in BOLT-LMM is capable of analysing large data  
141 sets while also accounting for cryptic relatedness between individuals. Specifically, BOLT-LMM  
142 calibrates the association statistics using a linkage disequilibrium (LD) score regression  
143 approach<sup>33</sup>; this allowed us to evaluate the impact of confounding factors on the GWAS test  
144 statistics<sup>33</sup> and calibrate them accordingly. In the absence of confounding factors, p-values should  
145 not be inflated, and the LD score regression intercept should be equal to 1<sup>33</sup>. The LD Score  
146 regression intercept in this study was  $1.043 \pm 0.007$ , suggesting minimal inflation of *P* values due  
147 to linkage between markers. After calibrating the test statistics, the mean  $\chi^2$  of the ALM GWAS  
148 was 1.27 and lambda ( $\lambda_{GC}$ ) or genomic control inflation factor was 1.20 (Figure S1), which  
149 indicated polygenicity of the trait as described by Bulik-Sullivan and colleagues<sup>33</sup>.

150 We also assessed population structure by running principal component analysis on the  
151 genotype calls. We included sex, leg length, whole body fat, and the first four principal components

152 as fixed effects in the LMM used for the ALM GWAS. Sex was included to account for differences  
153 in muscle mass caused by increased testosterone levels in males<sup>34</sup>. Leg length and whole body fat  
154 were included because they are biologically related to muscle mass: longer bones result in longer  
155 muscles, while fat shares part of its developmental origin with skeletal muscle tissue<sup>35</sup>.  
156 Furthermore, each of these traits is correlated with muscle mass. An association was considered  
157 statistically significant if its  $P < 5 \times 10^{-8}$  ( $\alpha = 0.05$ ). This threshold is the standard for GWAS of  
158 complex traits<sup>36; 37</sup>.

159 We obtained variance components and SNP heritability estimates of ALM using BOLT-  
160 REML<sup>32</sup>. The BOLT-REML method robustly estimates the variance of genotyped SNPs and fixed  
161 effects on the LMM. As described by Loh et al.<sup>38</sup>, BOLT-REML partitions the SNP heritability  
162 across common alleles; hence, the additive variance is calculated as the cumulative variance of  
163 genotyped SNPs.

164

## 165 Age effect on ALM GWAS

166 To examine the influence of varying age on the genomic loci associated with ALM repeated  
167 the analysis using a cohort with a wider age range. To achieve this we subset the middle-aged  
168 cohort by randomly selecting 44,727 individuals (37 to 48 years), and likewise, we selected a  
169 subset of 44,727 older individuals from the elderly cohort (63 to 74 years) to produce a mixed age  
170 population ( $n = 95,454$ ) (Table S2). We used this population to execute a GWAS on ALM using  
171 BOLT-LMM, and included sex, age, leg length and whole body fat as fixed effects in our model. We  
172 compared the resulting loci ( $MAF > 0.001$ ) (Table S8) from this analysis to the ALM loci that we  
173 identified on the GWAS conducted exclusively in the middle-aged population of a similar sample  
174 size ( $n=95,454$ ). This analysis was restricted to one iteration due demand for computational  
175 resources (~130h per GWAS).

176



## 177 Phenotypic variance explained by ALM loci

178 We defined ALM genomic loci using the web-based platform Functional Mapping and  
179 Annotation of Genome-Wide Association Studies (FUMA GWAS<sup>39</sup>). A key feature of this tool is the  
180 identification of genomic regions based on the provided summary statistic of a GWAS depending  
181 on LD structure; this process is automated using pairwise LD of SNPs in the reference panel (1000  
182 genomes project phase 3<sup>40</sup>) previously calculated by PLINK<sup>41</sup>. We provided to FUMA GWAS the  
183 summary statistic of our GWAS on ALM with the following parameters: 250kb window (maximum  
184 distance between LD blocks),  $r^2 > 0.6$  (minimum  $r^2$  for determining LD with independent genome-  
185 wide significant SNPs used to determine the limits of significant genomic loci),  $MAF > 0.001$   
186 (minimum minor allele frequency to be included in the annotation),  $P < 5 \times 10^{-8}$  (threshold of  
187 significance associated variants). In addition, we then performed a stepwise conditional analysis  
188 using the software package GCTA<sup>42</sup> to identify extra independent signals within 500kb window;  
189 this analysis was conducted only on statistically significant SNPs ( $P < 5 \times 10^{-8}$ ) with  $MAF > 0.001$ .  
190 We refer to the identified regions and the independent signals as loci throughout the text.

191 We used the top variant (based on the outcome from FUMA<sup>39</sup> and GCTA<sup>42</sup> software  
192 packages) (Table S5) of each locus identified to estimate the proportion of phenotypic variance  
193 explained by each locus. We estimated phenotype residuals using a model that included the fixed  
194 effects and principal components described above. We then regressed the residuals on the  
195 genotype of the top SNP in a linear model. We estimated the coefficients of determination and  
196 reported them as the proportion of phenotypic variance explained by each locus.

197

## 198 Genetic effects in the elderly cohort

199 We tested the combined effect of all 125 genome-wide significant ALM loci identified in the  
200 middle-aged cohort in the elderly cohort using the top SNP at each locus. We used PLINK2<sup>41</sup> to  
201 impute genotype dosages for each variant identified in the middle-aged GWAS in the elderly  
202 cohort. We then estimated a 'genetic lean mass score' for each individual using the following  
203 procedure. First, we estimated the contribution of each variant on the phenotype as a product of

204 the SNP effect size obtained from BOLT-LMM ( $\beta$ , calculated based on the reference allele) and the  
205 genotype dosage. Second, we calculated the 'lean mass score' for each individual as the sum of  
206 the products for all selected variants. We ranked the resulting distribution of lean mass scores in  
207 ascending order and partitioned it into five quantiles. We used ALM without any adjustment (raw  
208 ALM) because estimates of effects size already accounted for sex, whole body fat and leg length  
209 differences. However, since the raw ALM did not meet the assumption of normality, we used a  
210 Kruskal-Wallis test (non-parametrical) to evaluate the difference in the median of the phenotypes  
211 between the quantiles, and a Wilcoxon test (non-parametrical) for pairwise comparisons between  
212 quantiles. We conducted five replicates of a negative control test that consisted on randomly  
213 selecting a subset ( $n = 125$ ) of non-significant SNPs in the middle-aged cohort and generating  
214 'lean mass score' as described above for the elderly cohort, this set of SNPs had  $MAF > 0.001$ .

215 We also aimed to replicate the individual variants effects on the ALM of the elderly cohort.  
216 We checked normality of ALM in the elderly cohort as described for the middle-aged cohort. We  
217 tested a subset of genetic variants ( $n=17,988,060$ ) selected based on their  $MAF > 0.001$  and we  
218 used the same LMM, fixed covariates, and genome-wide significance threshold ( $P < 5 \times 10^{-8}$ ) as  
219 described for the middle-aged cohort. We conducted a Fisher's exact test to evaluate if overlapping  
220 loci between the middle-aged and elderly cohorts were significantly different from random. The null  
221 hypothesis was rejected at  $P < 0.05$  (two-tailed).

222

## 223 Genomic regions tagged by loci

224 We used the 'biomaRT' package in R<sup>43; 44</sup> to retrieve gene and regulatory element  
225 annotations at the genomic position of each statistically significant SNP ( $P < 5 \times 10^{-8}$ ) and  
226 Polyphen 2 and SIFT<sup>45; 46</sup> to predict the functional consequences of each SNP. We retrieved  
227 additional information about the positional candidate genes and their expression levels from  
228 Ensembl<sup>47</sup> (release 94 - October 2018) and the Gene Tissue Expression Project (GTEx) portal<sup>48</sup>  
229 (See Web Resources).

230

## 231 Stage two: LGSM AIL mouse cohort and GWAS

232 We used three LGSM AIL mouse cohorts for the second stage of this study (n = 1,867).  
233 The LGSM AIL was initiated by Dr. James Cheverud at Washington University in St. Louis<sup>49</sup>.  
234 Cohort 1 included 490 mice (253 males and 237 females) from LGSM F<sub>34</sub>. Phenotype data was  
235 collected from these mice between 80-102 days of age. Cohort 2 consisted of 506 male mice from  
236 F<sub>50-54</sub>. Cohort 3 includes 887 mice (447 males and 440 females) from F<sub>50-56</sub>; with age 64 to 111  
237 days of age. Mice were housed at room temperature (70 - 72°F) at 12:12 h light-dark cycle, with 1-  
238 4 same-sex animals per cage and with *ad libitum* access to standard lab chow and water.

239

## 240 Mouse traits and genotypes

241 We collected muscle phenotypes after the animals were sacrificed and frozen. We  
242 dissected four muscles and one long bone (tibia or femur) from each mouse at the Pennsylvania  
243 State University (n = 584) and the University of Aberdeen (n = 1,283). The dissection procedure  
244 involved defrosting the carcasses and removing the muscles (TA, EDL, gastrocnemius and soleus)  
245 and tibia from the hind limbs under a dissection microscope. We weighed the muscles to 0.1-mg  
246 precision on a Pioneer balance (Pioneer, Ohaus) and measured bone length (mm) using an  
247 electronic digital calliper (Powerfix, Profi). We quantile normalized all LGSM AIL traits before  
248 mapping QTLs.

249 Cohort 1 was genotyped using a custom SNP genotyping array<sup>50</sup>. These SNPs (n=2,965)  
250 were evenly distributed along the autosomes (mm8, build 36). The median distance between  
251 adjacent SNPs was 446 Kb, and the maximum was 18 Mb. Cohort 2 was genotyped at 75,746  
252 SNPs (73,301 on the autosomes and 2,386 on X and Y) using the MEGA Mouse Universal  
253 Genotyping Array (MegaMUGA; mm9, build 37); we retained 7,168 autosomal SNPs for  
254 subsequent analyses. The median distance between adjacent SNPs was 126.9 Kb and the  
255 maximum distance was 15 Mb for all chromosomes except for chromosomes 8, 10, and 14, which  
256 had distances of 19, 16, and 16 Mb, respectively. We used a conversion tool in Ensembl to convert  
257 SNP positions from mm8 (build 36) and mm9 (build 37) to mm10 (build 38). Cohort 3 genotypes

258 were obtained from Gonzales and colleges<sup>51</sup>. These genotypes were generated using genotyping  
259 by sequencing. This approach has been recently used and described in detail<sup>19</sup>. Only autosomal  
260 SNPs known to be polymorphic in the LG/J and SM/J founder strains (n=523,027; mm10, build 38)  
261 were retained for subsequent analyses. We combined the genotype data from Cohorts 1-3 using  
262 PLINK v.1.9 and imputed missing genotypes using BEAGLE v.4.1<sup>52</sup>. For these steps, we used a  
263 reference panel obtained from Heather Lawson's whole genome sequencing data of the LG/J and  
264 SM/J strains<sup>53</sup>. Dosage estimates (expected allele counts) were extracted from the output and  
265 used for the GWAS; these estimates captured the degree of uncertainty from the imputation  
266 procedure. To ensure the quality of the genotype data, we excluded SNP genotypes with MAF <  
267 0.20 and dosage  $R^2 < 0.70$  (dosage  $R^2$  corresponds the estimated square correlation between the  
268 allele dosage and the "true allele dosage" from the genetic marker, and is used as a measure of  
269 imputation quality). After applying these filters, we retained 434,249 SNPs.

270

## 271 Mouse association analyses

272 The population structure can potentially lead to a rise of false positive associations<sup>54; 55</sup>. The  
273 LMM approach is used to map QTLs while dealing with confounding effects due to relatedness<sup>50; 56;</sup>  
274 <sup>57</sup>. We used the LMM method implemented in the software GEMMA (genome-wide efficient mixed-  
275 model association)<sup>58</sup> to analyse the mouse phenotypes. The LMM method implemented in the  
276 software GEMMA (genome-wide efficient mixed-model association)<sup>58</sup> was used for the association  
277 analysis of all the phenotypes. In our LMM model we include the genotypes, a set of fixed effects  
278 described later in this section, and a polygenic effect to deal with the population structure.

279 The polygenic effect is a random vector which was derived from a multivariate normal  
280 distribution with mean zero and a  $n \times n$  covariance matrix  $\sigma^2 \lambda K$ ; where  $n$  is the number of samples.  
281 The relatedness matrix  $K$  was defined by the genotypes. The two parameters,  $\sigma^2$  and  $\lambda$ , were  
282 estimated from the data by GEMMA; they represent the polygenic and residual variance  
283 components of the phenotypic variance, respectively.

284

## 285 Relatedness matrix and proximal contamination

286 We used the genotype data to estimate the relatedness matrix  $K$ , which was part of the  
287 covariance matrix. Although genotype-based and pedigree-based  $K$  matrices yield very similar  
288 results<sup>59; 60</sup>, we have shown that in general, genotype-based estimates are more accurate<sup>59; 61-63</sup>.  
289 We constructed the relatedness matrix as  $K = XX' / p$ , where  $X$  is the genotype matrix of entries  
290  $x_{ij}$  and  $n \times p$  dimensions,  $p$  is the number of SNPs.

291 The relatedness matrix  $K$  was estimated taking into account the potential problem of  
292 proximal contamination<sup>60</sup>, which involves loss of power due to including genetic markers in multiple  
293 components of the LMM equation. Furthermore, because of LD, markers in close proximity to the  
294 genetic marker that is being tested can also lead to deflation of the  $P$  values<sup>61</sup>. To avoid this  
295 problem, the  $K$  matrix was estimated by excluding from the calculations the SNPs within the  
296 chromosome that was analysed, therefore,  $K$  matrix was slightly different for each chromosome.

297

## 298 Genetic and fixed effects

299 We did not include non-additive effects in the LMMs used for GWAS in the LGSM AIL. Our  
300 previous studies<sup>6</sup> suggest that musculoskeletal traits in this population are mostly influenced by  
301 additive loci, and by ignoring dominance effects we avoid introducing an additional degree of  
302 freedom, hence potentially avoiding a decrease of power to detect QTLs.

303 To analyse the muscle weights of the combined data, we used four fixed effects in the  
304 LMM: sex, dissector of the samples, age, and long bone length. We selected these variables after  
305 using a linear model to estimate their effect on the four muscles; only statistically significant effects  
306 were included ( $P < 0.01$ ). Sex and dissector were included as binary variables; whereas age and  
307 long bone were included as continuous variables. Including long bone length allowed us to capture  
308 genetic effects associated with variation in muscle weight *per se* (as opposed to genetic effects on  
309 bone length)<sup>19</sup>. In other words, failing to include long bone as a covariate would yield QTLs that  
310 are more likely to be genetic contributors to general growth of the skeleton instead of specifically  
311 muscle. We used two bones for the long bone variable, for cohort 1 femur, and for cohorts 2 and 3

312 tibia. Based on personal communication with Dr. Cheverud, the femur and tibia bones were found  
313 to be positively and highly correlated ( $r > 0.8$ ) in LGSM AIL (F34). We did not include generation ( $r$   
314 = 1) and bone type of each cohort ( $r = 1$ ) as fixed effects since the dissector variable functioned as  
315 a proxy for these two variables. Body weight was not used as a fixed effect because muscle weight  
316 accounts for a considerable amount of the body weight.

317

## 318 SNP heritability

319 To estimate the SNP heritability or proportion of phenotypic variance explained by all  
320 genotypes, we used the  $n \times n$  realized relatedness matrix  $K$ , which was constructed using all the  
321 available genotypes. We extracted the SNP heritability from the QTL mapping outputs; GEMMA  
322 provides an estimate of the heritability and its standard error<sup>58</sup>. The SNPs available to estimate the  
323 heritability do not capture all genetic causal variants, hence the SNP heritability underestimate the  
324 true narrow sense heritability.

325

## 326 Threshold of significance and QTLs intervals

327 The p-values estimated from the likelihood ratio test statistic performed by GEMMA were  
328 transformed to  $-\log_{10}$  p-values. We calculated a threshold to evaluate whether or not a given SNP  
329 significantly contributes to a QTL. We estimated the distribution of minimum p-values under the null  
330 hypothesis and selected the threshold of significance to be  $100(1 - \alpha)^{\text{th}}$  percentile of this  
331 distribution, with  $\alpha = 0.05$ . In order to estimate this distribution, we randomly permuted phenotypes  
332 1,000 times, as described previously<sup>6; 7; 19; 64</sup>. We did not include the relatedness matrix in the  
333 permutation tests due to computational restrictions, and because, past studies have found that  
334 relatedness does not have a major effect on the permutations test<sup>6; 7</sup>.

335 We estimated QTL intervals in three steps. 1) We used Manhattan plots to identify the top  
336 SNP within each statistically significant region (SNP with highest  $-\log_{10}$  p-values), which we refer to  
337 as the peak QTL position. 2) We transformed  $P$  values from each analysis to LOD scores (base-10  
338 logarithm of the likelihood ratio). 3) We applied the LOD interval function implemented in the *r/qlt*

339 package<sup>65</sup> to the regions tagged by each peak SNP, and obtained the QTL start and end positions  
340 based on the 1.5 LOD score interval. 1.5 LOD intervals are commonly used to approximate the ~  
341 95% confidence interval of mouse QTLs<sup>5; 66</sup>. The 1.5 LOD interval estimation is comparable to the  
342 95% CI in the case of a dense marker map<sup>67</sup>; hence, its coverage depends on the location of the  
343 peak QTL marker relative to the adjacent genotyped markers. We estimated the direction of the  
344 QTL effect by calculating the phenotypic mean of each allele based on the peak SNP of each QTL.  
345 We adjusted the phenotypic means and standard errors by fitting the fixed effects used in the  
346 association analyses to a linear model.

347 We explored the QTL intervals to identify genes that potentially affect muscle mass and  
348 bone length. We retrieved the genomic location of all genes located within the intervals using the  
349 BioMart database through the 'biomaRT' package implemented in R<sup>43; 44</sup>.

350

## 351 Gene validation using siRNA in C2C12 myoblasts

352 To validate efficiency of siRNA-mediated gene knockdown, the C2C12 cells were lysed and RNA  
353 isolated using RNeasy mini kit (QIAGEN) following manufacturers recommendations.  
354 Concentration was assessed using NanoDrop (Thermo Scientific) spectrophotometer and ~1.5 µg  
355 of RNA was applied to 1.5% agarose gel to validate its integrity. The cDNA was synthesised using  
356 random primers (Invitrogen) and SuperScript II reverse transcriptase (Invitrogen). Quantitative  
357 PCR for expression of the target *Cpne1* (F: 5'-GGACTGAACGTGTTTCGCAAC-3', R: 5'-  
358 ACACGGCTGTCCTTTAGCTC-3'), *Sbf2* (F: 5'-AGCCTGGTGTGGTATCCAG-3', R: 5'-  
359 GTCTCCTGCACCCAAGGAAA-3') and *Stc2* (F: 5'-TGACCCTGGCTTTGGTGTGGT-3', R: 5'-  
360 GACTTTCCCTGGGCATCGAA-3') genes and the reference *Actb* (F: 5'-  
361 GGTGGGAATGGGTCAGAAGG-3', R: 5'-GTACATGGCTGGGGTGTGA -3') gene was carried  
362 out in duplicates on LightCycler 480 II (Roche) using SYBR green Master mix (Roche), 10 ng  
363 cDNA and 0.5 µM forward and reverse primer. Quantification of gene expression was performed  
364 using the comparative Ct method<sup>68</sup>.

365 C2C12 myoblasts, validated for differentiation, were seeded on 8-chamber slide (Lab-Tek II), batch  
366 1, and 13 mm diameter Thermanox Plastic coverslips (Thermo Fisher Scientific), batch 2, at 100  
367 cells/mm<sup>2</sup> in high glucose growth medium (D5671, Sigma), containing 10% foetal calf serum and  
368 2% glutamine. Next day the cells were washed with PBS and transferred to differentiation medium  
369 (D5671, Sigma) supplemented with 10 nM siRNA and Lipofectamine RNAiMAX (Invitrogen) as per  
370 manufactures protocol. We used the following siRNAs (Life Technologies): negative control #1,  
371 s113938 and 93494 (*Cpne1*), 151885 and 151886 (*Stc2*), s115441 and s115442 (*Sbf2*). The  
372 treatment achieved expression knockdown by 55-70%. The differentiation medium with 10nM  
373 siRNA and Lipofectamine RNAiMAX were replaced once, after 3 days of incubation. After 6 days of  
374 incubation, cells were fixed in 4% paraformaldehyde (PFA). We examined 8 cultures for *Stc2* and  
375 12 for the remaining genes (equally divided between the two siRNAs) and negative control that  
376 were generated in two batches on separate occasions.

377 Cells were washed in PBS, fixed in 4% PFA for 15 min, PBS washed again and permeabilized for  
378 6 min with 0.5% Triton X-100 in PBS. The cells were then blocked for 30 min in blocking buffer  
379 (10% foetal calf serum in PBS) and incubated overnight at 4 °C with primary anti-myosin heavy  
380 chains antibody (Monoclonal Anti-Myosin skeletal, Fast, Clone My-32, Mouse Ascities Fluid,  
381 M4276, Sigma-Aldrich) diluted (1:400) in PBS. After three washes in 0.025% Tween-20 in PBS at  
382 room temperature, secondary donkey anti-mouse IgG H&L antibody (ab150109, abcam)  
383 conjugated to fluorescent dye (Alexa Fluor 488) in PBS (1:400) were applied and incubated for 90  
384 minutes. Following three washes in 0.025% Tween-20 in PBS cells were incubated in 300 nM  
385 DAPI in PBS for 15 min. After that cells were covered by coverslip using Mowiol 4-88 (Sigma-  
386 Aldrich), sealed with nail polish and stored at 4 °C in the dark.

387 Slides were scanned using Axioscan Z1 slide scanner (Zeiss) using X20 magnification objective.  
388 The entire 0.7 cm<sup>2</sup> chamber of a slide or a coverslip was imaged using the wavelength spectrum  
389 band of 353-465 nm and 493-517 nm and exposure time 4 ms and 100 ms for DAPI and Alexa  
390 Fluor, respectively, at 50% Colibri 7 UV-free LED light source intensity. Alexa Fluor and DAPI  
391 channel images of a rectangle area free of artefacts and covering at 14-91% of a chamber of batch  
392 1 and 70% of a coverslip of batch 2 were exported separately for analyses with Fiji<sup>69</sup>. Note that the



393 rectangle area of the majority of batch 1 samples (88%), covered more than 40% of the cell  
394 culture. The exclusion of small coverage images (14-31%) from the statistical analyses described  
395 below, showed results comparable to the analysis of all samples; therefore, we reported  
396 significance values ( $P$  values) corresponding to the statistical analysis of all samples.

397 Three indices characterising the effect of treatment on myogenesis were quantified in an unbiased,  
398 automated analyses of the entire exported area: 1) percentage of fluorescent in the Alexa Fluor  
399 channel, reflecting the level of myosin expression, and 2) the longest-shortest-path reflecting the  
400 length and number of myotubes (Figure S4). The longest-shortest-path analysis was carried out  
401 using the analyse skeleton plugin<sup>70</sup> and the shortest path calculation function<sup>71</sup> implemented in  
402 Fiji<sup>69</sup>. We carried out the images analyses on a Linux computer and we allocated 190 GB of RAM  
403 memory for these analyses. The myotube threshold was set at 103.97  $\mu\text{m}$  for batch 1 and 191.63  
404  $\mu\text{m}$  for batch 2, i.e. the mean (batch 1: 54.34  $\mu\text{m}$ , batch 2: 100.95  $\mu\text{m}$ ) plus 3 standard deviations  
405 (batch 1: SD = 16.54  $\mu\text{m}$ , batch 2: SD = 30.23  $\mu\text{m}$ ) of the length of mononucleated and myosin  
406 expressing myocytes ( $n=35$ ) measured in the negative control #1 cells. The myotube length  
407 variable did not follow normality, therefore quantile normalization was applied to the variable. All  
408 statistical analyses were adjusted for the image area of each sample and batch of cells, by fitting a  
409 linear model on the three indices investigated; all subsequent statistical analyses were conducted  
410 on the residuals, which met the assumptions of normality and homoscedasticity of residuals. Effect  
411 of gene knockdown on these indices was assessed using an ANOVA test to confirm the presence  
412 of a statistically significant knockdown effect. After, a T-test was carried out to evaluate the mean  
413 differences between the control group and the gene knockdown groups. In addition, we evaluated  
414 the myosin expressing area (as percentage of the total) present within in each knockdown versus  
415 control groups with an ANOVA test.

416

## 417 Data availability

418 The human data used for this study can be obtained upon application to the UK biobank project<sup>15</sup>.

## 419 Results

### 420 Over 100 genomic loci associated with appendicular lean mass in humans

421 The appendicular lean mass (ALM) ranged from 11.8 to 41.6 kg and 15.3 to 42.5 kg in healthy  
422 middle age females and males, respectively (Table 1). SNP heritability estimates indicated that  
423 35% of phenotypic variability was due to genetic factors. The GWAS analysis revealed 6,150  
424 autosomal variants (MAF > 0.001) associated ( $P < 5 \times 10^{-8}$ ) with ALM (Figure 1). The associated  
425 variants tagged 293 genes and 385 regulatory elements. We used the Functional Mapping and  
426 Annotation of Genome-Wide Association Studies (FUMA GWAS<sup>39</sup>) to define genomic regions  
427 containing the associated variants, and we identified 77 of them that were on average 0.24 Mb  
428 long. Furthermore, we conducted a stepwise conditional analysis that partitioned some of the  
429 genomic regions and yielded 48 additional independent signals. We refer to the identified regions  
430 and the independent signals as loci throughout the text. In total, we identified 125 loci for ALM  
431 (Table S5) which indicates that ALM is influenced by multiple genetic elements. The LD score  
432 intercept that we estimated during this ALM GWAS ( $1.043 \pm 0.007$ ) provides further evidence for  
433 polygenicity. Cumulative effects of these loci explained 14.28% of SNP heritability.

434

### 435 64% of the same loci affect appendicular lean mass in older adults

436 Consistent with the aging effect on skeletal muscle, the ALM in the cohort of elderly  
437 declined by 4 and 8% in comparison to the middle-age cohort of females and males, respectively  
438 ( $P < 2 \times 10^{-16}$ ). We then used a 'genetic lean mass score' (see Methods for details) to test if the  
439 identified 125 loci contributed to ALM variability in the elderly population. The genetic lean mass  
440 score had a statistically significant overall effect ( $\chi^2 = 583.6$ ,  $df = 4$ ,  $P = 5.46 \times 10^{-125}$ ) on ALM  
441 variability in the elderly population (Figure 2). On average, individuals with the highest genetic lean  
442 mass score had 0.90 kg, or 4%, more ALM compared to those with the lowest scores (Figure 2).  
443 We also found that in some instances negative control iterations resulted in statistically significant  
444 ( $P < 0.05$ ) effects (Table S3), however the ALM differences between groups on the negative

445 controls were modest and in the opposite direction of what would be expected (Type III error)  
446 (Figure S3).

447 We also asked if the variants identified in the middle-aged cohort were associated with ALM  
448 in the elderly. A GWAS in the elderly cohort replicated 4,984 variants based on their  $P$  value ( $P < 5$   
449  $\times 10^{-8}$ ) and allelic effect ( $\beta$ ); moreover, the replicated variants tagged 64% of the ALM loci of the  
450 middle-aged cohort (two tailed Fisher test  $P$  value  $< 2.2 \times 10^{-16}$ ). Overall, the set of genomic loci in  
451 the elderly cohort appeared similar to that of the middle-aged adults, with the exception of an  
452 approximately 5 Mb region on chromosome 5 (Figure S2). This region showed a very strong  
453 association with the ALM variability in older adults (lowest  $P$  value =  $3.10 \times 10^{-55}$ ,  $\beta = 0.12 \pm$   
454  $0.01$  kg), and had a modest albeit significant association with the ALM of middle-aged individuals  
455 (lowest  $P$  value =  $3.30 \times 10^{-11}$ ) with an effect size of  $\beta = 0.07 \pm 0.01$  kg.

456

457 23 QTLs contribute to muscle weight variability in LG/J and SM/J strain-  
458 derived advanced inter-cross lines.

459 We examined the weight of four hindlimb muscles of the LGSM AIL ( $F_{34}$  and  $F_{50}$ - $F_{56}$ ): tibialis  
460 anterior (TA), extensor digitorum longus (EDL), gastrocnemius and soleus. The LGSM AIL  
461 muscles showed extensive individual variability (Table 2); furthermore, the SNP heritabilities of the  
462 TA, EDL, gastrocnemius and soleus muscles were 0.39, 0.42, 0.31 and 0.30, respectively (Table  
463 2). The genome mapping of LGSM AIL muscles yielded 23 QTLs ( $P < 6.45 \times 10^{-06}$ ). The TA, EDL  
464 and gastrocnemius QTLs explained more than the 50% of the SNP heritability of each trait (Table  
465 S6). The soleus muscle phenotypic variability explained by QTLs was 23% of its SNP heritability.  
466 Three QTLs were shared between the four muscles (chromosome 7, 11 and 13; (Figure 3); the  
467 QTL on chromosome 13 resulted in the strongest association (EDL  $P = 2.95 \times 10^{-21}$ ), with its peak  
468 position at 104,435,003 bp, and the percentage of phenotypic variance explained by this locus was  
469 5.2%; the SM/J allele conferred increased muscle mass (Figure 3). Furthermore, six QTLs were

470 shared between two or three muscles, while fourteen identified QTLs were only associated with  
471 one specific muscle (Figure 3).

472 The mapping resolution was comparable to that attained in the previous study in the LGSM  
473 AIL cohort<sup>51</sup>. On average, mouse QTLs were 2.80 Mb long (based on the 1.5 LOD interval) and  
474 encompassed 2,259 known genes (Table S7). The median number of genes per QTL was 55;  
475 more than half of the mouse QTLs enclosed a modest number of genes, however, seven QTLs  
476 contained more than 100 genes each, and a single QTL located on chromosome 7 as many as 644  
477 genes (Table S6). Although all mouse QTLs identified in the LGSM AIL contained polymorphic  
478 SNPs, at least seven QTLs covered long genomic regions characterised as identical by descent  
479 (IBD) between the LG/J and SM/J strains<sup>53</sup>.

480

481 Interspecies overlap between appendicular lean mass loci and muscle weight

482 QTLs

483 The ALM mainly consists of the skeletal muscle of the extremities; however, other tissues  
484 also contribute. To test the hypothesis that ALM-associated genetic variants primarily affect the  
485 skeletal muscle mass, we overlaid the mouse and human findings. This analysis identified five  
486 syntenic regions associated with ALM in humans and muscle mass in mice. This analysis  
487 permitted us to shorten the list of positional candidates. Assuming the same causative entity for an  
488 overlapping mouse and human locus, these five loci harbour only nine homologous genes.  
489 Encouragingly, four of these five genomic loci replicated in the ALM of the elderly cohort.

490

491 Selected candidate genes

492 In selection of the candidate genes we focused on the five most robust loci highlighted by  
493 both mouse and human GWAS. Out of the nine genes within these five loci (Table 3), we  
494 prioritised the most relevant genes for further testing based on the following information.

495 *STC2*

496 The *STC2* gene had the largest effect size on the ALM in our analyses (beta = 0.877 ± 0.13  
497 kg). The minor allele (A) of a missense SNP (rs148833559 (A/C) was associated with the increase  
498 in ALM. Prediction tools (SIFT<sup>46</sup>, PolyPhen<sup>72</sup>, CADD<sup>73</sup>, and REVEL<sup>74</sup>) suggested that the  
499 rs148833559 SNP was likely to have a detrimental consequence on *STC2* protein structure.  
500 Furthermore, *STC2* is expressed in human skeletal muscle<sup>48</sup>.

501 *SBF2*

502 The *SBF2* gene is expressed in skeletal muscle<sup>48</sup> and its expression in skeletal muscle is  
503 associated with a cis-eQTL<sup>48</sup>. In addition, within the QTL containing the *SBF2* gene, we found that  
504 the majority of genetic variants associated with ALM were located within *SBF2*.

505 *CPNE1*

506 Although little is known about *CPNE1*, it is an intriguing candidate because a premature  
507 stop variant (rs147019139) within the gene was associated with an increase in ALM. Furthermore,  
508 *Cpne1* was implicated as a positional candidate gene for muscle mass by previous GWAS  
509 conducted in outbred (CFW) mice<sup>5</sup>.

510

511 Novel modifiers of *in vitro* myogenesis

512 We used siRNA-mediated gene knockdown in C2C12 cells to test if candidate genes  
513 affected myogenic differentiation. The *STC2*<sup>75</sup>, *CPNE1* (identified as a positional candidate by  
514 previous research conducted in CFW mice<sup>5</sup>) and *SBF2* (linked to an aggressive type of Charcot-  
515 Marie-Tooth disease<sup>76</sup>) genes were prioritised for this assay. We assessed indices of myogenic  
516 differentiation (the number and length of the myotubes, and expression of myosin) of C2C12 cells.  
517 In total, 34,989 myotubes were identified and measured in 44 cell cultures (see Methods for  
518 details). The gene knockdown had a significant effect on myotube length, with *Cpne1* ( $P = 0.001$ ,  
519 95% confidence interval = 0.019-0.068, effect size = 0.024) and *Stc2* ( $P = 0.015$ , 95% confidence  
520 interval = 0.007-0.066, effect size = 0.017) showing an increase in length compared to the control

521 cells (Figure 4). There was no significant difference for the *Sbf2* gene. The pattern of the effect on  
522 myosin expressing area was similar to that of myotube length, however, it did not reach statistical  
523 significance ( $P = 0.21$ ). The number of myotubes was also unaffected.

524

## 525 Discussion

526 The key findings of the present report are as follows: *i*) we identified a set of over 100 loci  
527 associated with ALM, a substantial expansion in comparison to previous human studies. *ii*) There  
528 is a substantial overlap of the genetic effects between middle aged and elderly subjects. *iii*)  
529 Integration of mouse and human GWAS indicates that skeletal muscle is the primary component  
530 affected by the ALM loci, facilitates prioritisation of candidate genes, and helps prediction of their  
531 effect on cellular mechanisms. *iv*) *In vitro* validation of two genes, *CPNE1* and *STC2*, as novel  
532 modifiers of muscle mass in humans.

533 In total, we mapped 125 loci that collectively explain 14.27% of the SNP heritability of ALM.  
534 The most recent report, a meta-analysis of 47 independent cohorts (dbGAP), comparable in  
535 sample size but ranging in subjects aged 18-to-100 years, reported five significant associations  
536 with lean body mass<sup>8</sup>. Even fewer associations were detected in the earlier, small sample size  
537 studies<sup>10; 12-14; 77</sup>. However, our results indicate that ALM is a truly polygenic trait in humans. We  
538 hypothesize that multiple factors contributed to the improved locus detection in the present GWAS.  
539 We restricted subjects' age to a narrow range, 37 to 48 years, minimising the effects of the  
540 developmental and aging-related processes on phenotypic variance. The skeletal muscle is a  
541 dynamic tissue reaching its peak mass by late 20s, then a trend of decline emerges after 40s and  
542 accelerates about two decades later<sup>1</sup>. An estimated 30-50% decline in muscle mass can be  
543 expected between 40 and 80 years of age<sup>78</sup>. These developmental and aging-related changes are  
544 not linear in progression and therefore would hamper detection of loci even if accounted for in a  
545 linear model. We tested the age effect hypothesis in a randomly generated data set of a similar  
546 size ( $n=95,454$ ) which was equally divided between middle-aged and older individuals. A GWAS  
547 on ALM in this dataset identified ~ 13% fewer loci (Table S8) compared to solely middle-aged

548 adults. This analysis also captured the five loci identified by Zillikens and colleagues<sup>8</sup>, suggesting  
549 that the effects of these loci might be less sensitive to the age differences. Hence, our results  
550 support the notion of age effect, which is likely to have a large impact with increasing age range. In  
551 addition, unlike Zillikens and colleagues<sup>8</sup>, the data set we used was systematically collected as  
552 described by the UK Biobank project<sup>15</sup> and we only employed BIA measurements of lean mass.  
553 Furthermore, we used a LMM to test the effects of > 17 million variants (MAF > 0.001), and our  
554 analysis was adjusted for a different set of fixed effects than in previous research<sup>8; 10; 12; 14</sup>. Hence,  
555 a combination of a homogeneous age group, the optimised genomic coverage and the method  
556 used to conduct this association analysis contributed to improved detection of loci in the present  
557 study.

558         The analyses presented here shed light into the complex genetic mechanisms behind the  
559 appendicular muscle mass of humans. In the past, concern was expressed about the  
560 reproducibility of association analyses of complex traits; however, an increasing number of human  
561 GWAS have shown that their findings are remarkably reproducible<sup>79</sup>. The present study provides  
562 further support for the reliability of association studies, demonstrating replication of 64% of ALM  
563 loci in the elderly cohort. Furthermore, we show that the genetic profile characterised by depletion  
564 of ALM-increasing alleles leads to a lower ALM in elderly individuals (Figure 2). Hence, it is  
565 conceivable that genetic architecture predisposing individuals to lower muscle mass may lead to  
566 elevated risk of sarcopenia<sup>1</sup>.

567         Combining two experimental models, mouse and human, facilitated prioritization of  
568 candidate genes for functional validation. To establish the association between the QTGs  
569 underlying the identified loci and the muscular phenotype, we focused on the overlapping human  
570 and mouse results. Integration of results from these two species permitted circumvention of the  
571 limitations imposed by the individual models. While human GWAS often identify associated loci  
572 containing single genes, it is often unclear which tissue is most relevant to the phenotype. Although  
573 mouse QTLs often contain multiple positional candidate genes, mice can be used as experimental  
574 models to identify loci specifically associated with skeletal muscle. In this study, we used a mouse  
575 model to show that the association with skeletal muscle mass was specifically related to

576 differences in the cross-sectional area of the constituent muscle fibres, rather than to the number  
577 of muscle fibres in the muscle. This is because between the two founders of the LGSM AIL, the  
578 LG/J strain compared to the SM/J strain shows over 50% larger cross-sectional area of muscle  
579 fibres, but no difference in the number of fibres in soleus muscle<sup>21</sup>. Hence, it is conceivable that the  
580 QTGs of the majority of the overlapping loci affected muscle mass specifically via the hypertrophy  
581 of muscle fibres. Such prioritization between the two cellular mechanisms of muscle mass  
582 variability is important because genes specifically influencing cross-sectional area of muscle fibres  
583 can be targeted pharmacologically to prevent and reverse atrophy of muscle fibres in aging  
584 muscle<sup>80</sup>.

585 In an effort to validate the specific QTGs and to establish the causality of their effects on  
586 skeletal muscle, we tested the siRNA-mediated knockdown effect on myogenesis *in vitro*. A  
587 knockdown of two genes, *CPNE1* and *STC2*, increased the length of the myotubes, implicating an  
588 upregulation of myogenic differentiation. We interpret this *in vitro* observation as consistent with the  
589 allelic effect of the locus identified in human GWAS. A nonsense allele within *CPNE1* was  
590 associated with an increase in ALM in both middle age and elderly populations (Table S9). The  
591 gene encodes for Copine 1, a soluble calcium-dependent membrane-binding protein<sup>81</sup> that up to  
592 date had not been implicated in morphology or function of skeletal muscle. An allele of the second  
593 validated gene, *STC2*, was predicted to have a damaging effect on protein, and was also  
594 associated with an increase in ALM. This effect was consistent with overexpression results in a  
595 mouse model, showing that transgene animals had substantially reduced muscle mass<sup>75</sup>. The  
596 gene encodes Stanniocalcin 2, a homodimeric glycoprotein hormone abundantly expressed in  
597 skeletal and cardiac muscle<sup>82</sup>, although mechanisms of its effects on skeletal muscle remain  
598 unclear. Collectively these analyses revealed two novel modifiers of myogenesis, which were  
599 shown for the first time to be associated with muscle mass variability in humans.

600 In conclusion, the present study capitalised on the advantages of integrating human and  
601 mouse GWAS with *in vitro* validation of causative genes. Our results revealed over 100 genomic  
602 loci contributing to ALM in middle-aged humans. The effects of the majority of these loci persist in  
603 the elderly population. Integration of human and mouse data also highlighted novel candidate



604 genes affecting skeletal muscle mass in mammals. Two genes, *CPNE1* and *STC2* appear to be  
605 novel modifiers of *in vitro* myogenesis.

606

## 607 Supplemental Data

608 Supplemental Data include four figures, nine tables and macro script.

609

## 610 Declaration of interest

611 The authors declare no competing interests.

612

## 613 Acknowledgements

614 The authors would like to acknowledge Dr David A. Blizzard for his role in the development of the  
615 ideas that led to this study and feedback on the manuscript, Professor Helen Macdonald for  
616 valuable advice on study design, Dr Leslie R. Noble for help with the UK Biobank data, and Dr  
617 Joseph P. Gyekis for help genotyping cohort 2 mice. The authors would like to acknowledge  
618 funding from the University of Aberdeen for the Maxwell computer cluster, the Elphinstone and IMS  
619 studentship for AIHC; a Schweppe Foundation Career Development Award (AAP), and the NIH  
620 (NIAMS (AL: R01AR056280) and NIDA (AAP:R01DA021336, AAP:R21DA024845,  
621 AAP:T32MH020065, NMG:F31DA03635803), NIGMS (NMG:T32GM007197), NHGRI (MA:R01  
622 HG002899)).

623

## 624 Web Resources

625 Functional Mapping and Annotation of Genome-Wide Association Studies (FUMA GWAS)<sup>39</sup>. URL:

626 <http://fuma.ctglab.nl/>

627 Ensembl<sup>47</sup>. URL: <https://www.ensembl.org>

628 Gene Tissue Expression Project (GTEx) portal<sup>36</sup>. URL: <https://gtexportal.org/home/>

629

## 630 References

- 631 1. Lauretani, F., Russo, C.R., Bandinelli, S., Bartali, B., Cavazzini, C., Di Iorio, A., Corsi, A.M.,  
632 Rantanen, T., Guralnik, J.M., and Ferrucci, L. (2003). Age-associated changes in skeletal  
633 muscles and their effect on mobility: an operational diagnosis of sarcopenia. *J Appl Physiol*  
634 95, 1851-1860.
- 635 2. Janssen, I., Shepard, D.S., Katzmarzyk, P.T., and Roubenoff, R. (2004). The healthcare costs of  
636 sarcopenia in the United States. *Journal of the American Geriatrics Society* 52, 80-85.
- 637 3. Kim, J., Wang, Z., Heymsfield, S.B., Baumgartner, R.N., and Gallagher, D. (2002). Total-body  
638 skeletal muscle mass: estimation by a new dual-energy X-ray absorptiometry method. *Am J*  
639 *Clin Nutr* 76, 378-383.
- 640 4. Livshits, G., Gao, F., Malkin, I., Needhamsen, M., Xia, Y., Yuan, W., Bell, C.G., Ward, K., Liu, Y.,  
641 and Wang, J. (2016). Contribution of Heritability and Epigenetic Factors to Skeletal Muscle  
642 Mass Variation in United Kingdom Twins. *J Clin Endocrinol Metab* 101, 2450-2459.
- 643 5. Nicod, J., Davies, R.W., Cai, N., Hassett, C., Goodstadt, L., Cosgrove, C., Yee, B.K., Lionikaite,  
644 V., McIntyre, R.E., Remme, C.A., et al. (2016). Genome-wide association of multiple  
645 complex traits in outbred mice by ultra-low-coverage sequencing. *Nature Genetics* 48, 912-  
646 918.
- 647 6. Hernandez Cordero, A.I., Carbonetto, P., Riboni Verri, G., Gregory, J.S., Vandenberg, D.J., J,  
648 P.G., Blizard, D.A., and Lionikas, A. (2018). Replication and discovery of musculoskeletal  
649 QTLs in LG/J and SM/J advanced intercross lines. *Physiological reports* 6.
- 650 7. Carbonetto, P., Cheng, R., Gyekis, J.P., Parker, C.C., Blizard, D.A., Palmer, A.A., and Lionikas,  
651 A. (2014). Discovery and refinement of muscle weight QTLs in B6 x D2 advanced  
652 intercross mice. *Physiol Genomics* 46, 571-582.
- 653 8. Zillikens, M.C., Demissie, S., Hsu, Y.-H., Yerges-Armstrong, L.M., Chou, W.-C., Stolk, L.,  
654 Livshits, G., Broer, L., Johnson, T., Koller, D.L., et al. (2017). Large meta-analysis of  
655 genome-wide association studies identifies five loci for lean body mass. *Nat Commun* 8, 80.
- 656 9. Urano, T., and Inoue, S. (2015). Recent genetic discoveries in osteoporosis, sarcopenia and  
657 obesity. *Endocrine journal* 62, 475-484.
- 658 10. Hai, R., Pei, Y.-F., Shen, H., Zhang, L., Liu, X.-G., Lin, Y., Ran, S., Pan, F., Tan, L.-J., and Lei,  
659 S.-F. (2012). Genome-wide association study of copy number variation identified gremlin1  
660 as a candidate gene for lean body mass. *J Hum Genet* 57, 33.
- 661 11. Liu, X.G., Tan, L.J., Lei, S.F., Liu, Y.J., Shen, H., Wang, L., Yan, H., Guo, Y.F., Xiong, D.H.,  
662 Chen, X.D., et al. (2009). Genome-wide association and replication studies identified TRHR  
663 as an important gene for lean body mass. *Am J Hum Genet* 84, 418-423.
- 664 12. Guo, Y.-F., Zhang, L.-S., Liu, Y.-J., Hu, H.-G., Li, J., Tian, Q., Yu, P., Zhang, F., Yang, T.-L.,  
665 and Guo, Y. (2013). Suggestion of GLYAT gene underlying variation of bone size and body  
666 lean mass as revealed by a bivariate genome-wide association study. *Hum Genet* 132,  
667 189-199.
- 668 13. Ran, S., Liu, Y.-J., Zhang, L., Pei, Y., Yang, T.-L., Hai, R., Han, Y.-Y., Lin, Y., Tian, Q., and  
669 Deng, H.-W. (2014). Genome-wide association study identified copy number variants  
670 important for appendicular lean mass. *PLoS ONE* 9, e89776.
- 671 14. Urano, T., Shiraki, M., Sasaki, N., Ouchi, Y., and Inoue, S. (2014). Large-scale analysis reveals  
672 a functional single-nucleotide polymorphism in the 5'-flanking region of PRDM16 gene  
673 associated with lean body mass. *Aging cell* 13, 739-743.
- 674 15. Sudlow, C., Gallacher, J., Allen, N., Beral, V., Burton, P., Danesh, J., Downey, P., Elliott, P.,  
675 Green, J., Landray, M., et al. (2015). UK biobank: an open access resource for identifying  
676 the causes of a wide range of complex diseases of middle and old age. *PLoS medicine* 12,  
677 e1001779.

- 678 16. Lynch, N.A., Metter, E.J., Lindle, R.S., Fozard, J.L., Tobin, J.D., Roy, T.A., Fleg, J.L., and  
679 Hurley, B.F. (1999). Muscle quality. I. Age-associated differences between arm and leg  
680 muscle groups. *J Appl Physiol* (1985) 86, 188-194.
- 681 17. Kallman, D.A., Plato, C.C., and Tobin, J.D. (1990). The role of muscle loss in the age-related  
682 decline of grip strength: cross-sectional and longitudinal perspectives. *J Gerontol* 45, M82-  
683 88.
- 684 18. Guigo, R., Dermitzakis, E.T., Agarwal, P., Ponting, C.P., Parra, G., Reymond, A., Abril, J.F.,  
685 Keibler, E., Lyle, R., Ucla, C., et al. (2003). Comparison of mouse and human genomes  
686 followed by experimental verification yields an estimated 1,019 additional genes.  
687 *Proceedings of the National Academy of Sciences of the United States of America* 100,  
688 1140-1145.
- 689 19. Parker, C.C., Gopalakrishnan, S., Carbonetto, P., Gonzales, N.M., Leung, E., Park, Y.J.,  
690 Aryee, E., Davis, J., Blizard, D.A., Ackert-Bicknell, C.L., et al. (2016). Genome-wide  
691 association study of behavioral, physiological and gene expression traits in outbred CFW  
692 mice. *Nat Genet* 48, 919-926.
- 693 20. Carroll, A., Cheng, R., Collie-Duguid, E., Meharg, C., Scholz, M.E., Fiering, S.N., Fields, J.L.,  
694 Palmer, A.A., and Lionikas, A. (2017). Fine mapping of genes determining extrafusal fiber  
695 properties in murine soleus muscle. *Physiological genomics* 49, 141-150.
- 696 21. Carroll, A.M., Palmer, A.A., and Lionikas, A. (2012). QTL analysis of type I and type IIA fibers  
697 in soleus muscle in a cross between LG/J and SM/J mouse strains. *Frontiers in genetics* 2,  
698 99.
- 699 22. Partridge, C.G., Fawcett, G.L., Wang, B., Semenkovich, C.F., and Cheverud, J.M. (2014). The  
700 effect of dietary fat intake on hepatic gene expression in LG/J AND SM/J mice. *BMC*  
701 *genomics* 15, 1.
- 702 23. Cheverud, J.M., Vaughn, T.T., Pletscher, L.S., Peripato, A.C., Adams, E.S., Erikson, C.F., and  
703 King-Ellison, K.J. (2001). Genetic architecture of adiposity in the cross of LG/J and SM/J  
704 inbred mice. *Mammalian genome : official journal of the International Mammalian Genome*  
705 *Society* 12, 3-12.
- 706 24. Lionikas, A., Meharg, C., Derry, J., Ratkevicius, A., Carroll, A., Vandenberg, D., and Blizard,  
707 D.A. (2012). Resolving candidate genes of mouse skeletal muscle QTL via RNA-Seq and  
708 expression network analyses. *BMC genomics* 13.
- 709 25. Goodale, H. (1938). A study of the inheritance of body weight in the albino mouse by selection.  
710 *Journal of Heredity* 29, 101-112.
- 711 26. MacArthur, J.W. (1944). Genetics of Body Size and Related Characters. I. Selecting Small and  
712 Large Races of the Laboratory Mouse. *The American Naturalist* 78, 142-157.
- 713 27. Lionikas, A., Cheng, R., Lim, J.E., Palmer, A.A., and Blizard, D.A. (2010). Fine-mapping of  
714 muscle weight QTL in LG/J and SM/J intercrosses. *Physiological genomics* 42, 33-38.
- 715 28. Darvasi, A., and Soller, M. (1995). Advanced intercross lines, an experimental population for  
716 fine genetic mapping. *Genetics* 141, 1199-1207.
- 717 29. Bycroft, C., Freeman, C., Petkova, D., Band, G., Elliott, L.T., Sharp, K., Motyer, A., Vukcevic,  
718 D., Delaneau, O., O'Connell, J., et al. (2017). Genome-wide genetic data on ~500,000 UK  
719 Biobank participants. *bioRxiv*.
- 720 30. Howie, B., Marchini, J., and Stephens, M. (2011). Genotype imputation with thousands of  
721 genomes. *G3 (Bethesda, Md)* 1, 457-470.
- 722 31. Wood, A.R., Esko, T., Yang, J., Vedantam, S., Pers, T.H., Gustafsson, S., Chu, A.Y., Estrada,  
723 K., Luan, J., Kutalik, Z., et al. (2014). Defining the role of common variation in the genomic  
724 and biological architecture of adult human height. *Nat Genet* 46, 1173-1186.
- 725 32. Loh, P.-R., Tucker, G., Bulik-Sullivan, B.K., Vilhjalmsson, B.J., Finucane, H.K., Salem, R.M.,  
726 Chasman, D.I., Ridker, P.M., Neale, B.M., Berger, B., et al. (2015). Efficient Bayesian  
727 mixed-model analysis increases association power in large cohorts. *Nat Genet* 47, 284-  
728 290.
- 729 33. Bulik-Sullivan, B.K., Loh, P.R., Finucane, H.K., Ripke, S., Yang, J., Patterson, N., Daly, M.J.,  
730 Price, A.L., and Neale, B.M. (2015). LD Score regression distinguishes confounding from  
731 polygenicity in genome-wide association studies. *Nat Genet* 47, 291-295.
- 732 34. Egner, I.M., Bruusgaard, J.C., Eftestol, E., and Gundersen, K. (2013). A cellular memory  
733 mechanism aids overload hypertrophy in muscle long after an episodic exposure to  
734 anabolic steroids. *J Physiol* 591, 6221-6230.

- 735 35. Sanchez-Gurmaches, J., and Guertin, D.A. (2014). Adipocytes arise from multiple lineages that  
736 are heterogeneously and dynamically distributed. *Nat Commun* 5, 4099.
- 737 36. The International HapMap Consortium. (2005). A haplotype map of the human genome. *Nature*  
738 437, 1299-1320.
- 739 37. Pe'er, I., Yelensky, R., Altshuler, D., and Daly, M.J. (2008). Estimation of the multiple testing  
740 burden for genomewide association studies of nearly all common variants. *Genet Epidemiol*  
741 32, 381-385.
- 742 38. Loh, P.-R., Bhatia, G., Gusev, A., Finucane, H.K., Bulik-Sullivan, B.K., Pollack, S.J., de Candia,  
743 T.R., Lee, S.H., Wray, N.R., and Kendler, K.S. (2015). Contrasting genetic architectures of  
744 schizophrenia and other complex diseases using fast variance components analysis. *Nat*  
745 *Genet* 47, 1385.
- 746 39. Watanabe, K., Taskesen, E., van Bochoven, A., and Posthuma, D. (2017). Functional mapping  
747 and annotation of genetic associations with FUMA. *Nature Communications* 8, 1826.
- 748 40. Auton, A., Brooks, L.D., Durbin, R.M., Garrison, E.P., Kang, H.M., Korbel, J.O., Marchini, J.L.,  
749 McCarthy, S., McVean, G.A., and Abecasis, G.R. (2015). A global reference for human  
750 genetic variation. *Nature* 526, 68-74.
- 751 41. Chang, C.C., Chow, C.C., Tellier, L.C., Vattikuti, S., Purcell, S.M., and Lee, J.J. (2015).  
752 Second-generation PLINK: rising to the challenge of larger and richer datasets.  
753 *Gigascience* 4, 7.
- 754 42. Yang, J., Ferreira, T., Morris, A.P., Medland, S.E., Madden, P.A., Heath, A.C., Martin, N.G.,  
755 Montgomery, G.W., Weedon, M.N., Loos, R.J., et al. (2012). Conditional and joint multiple-  
756 SNP analysis of GWAS summary statistics identifies additional variants influencing complex  
757 traits. *Nat Genet* 44, 369-375, s361-363.
- 758 43. Durinck, S., Moreau, Y., Kasprzyk, A., Davis, S., De Moor, B., Brazma, A., and Huber, W.  
759 (2005). BioMart and Bioconductor: a powerful link between biological databases and  
760 microarray data analysis. *Bioinformatics (Oxford, England)* 21, 3439-3440.
- 761 44. Durinck, S., Spellman, P.T., Birney, E., and Huber, W. (2009). Mapping identifiers for the  
762 integration of genomic datasets with the R/Bioconductor package biomaRt. *Nature*  
763 *protocols* 4, 1184-1191.
- 764 45. Flanagan, S.E., Patch, A.M., and Ellard, S. (2010). Using SIFT and PolyPhen to predict loss-of-  
765 function and gain-of-function mutations. *Genetic testing and molecular biomarkers* 14, 533-  
766 537.
- 767 46. Ng, P.C., and Henikoff, S. (2003). SIFT: Predicting amino acid changes that affect protein  
768 function. *Nucleic Acids Res* 31, 3812-3814.
- 769 47. Frankish, A., Vulliamis, A., Zadissa, A., Yates, A., Thormann, A., Parker, A., Gall, A., Moore, B.,  
770 Walts, B., Aken, B.L., et al. (2017). Ensembl 2018. *Nucleic Acids Research* 46, D754-D761.
- 771 48. Carithers, L.J., Ardlie, K., Barcus, M., Branton, P.A., Britton, A., Buia, S.A., Compton, C.C.,  
772 DeLuca, D.S., Peter-Demchok, J., Gelfand, E.T., et al. (2015). A Novel Approach to High-  
773 Quality Postmortem Tissue Procurement: The GTEx Project. *Biopreservation and*  
774 *biobanking* 13, 311-319.
- 775 49. Cheverud, J.M., Routman, E.J., Duarte, F., van Swinderen, B., Cothran, K., and Perel, C.  
776 (1996). Quantitative trait loci for murine growth. *Genetics* 142, 1305-1319.
- 777 50. Cheng, R., Lim, J.E., Samocha, K.E., Sokoloff, G., Abney, M., Skol, A.D., and Palmer, A.A.  
778 (2010). Genome-wide association studies and the problem of relatedness among advanced  
779 intercross lines and other highly recombinant populations. *Genetics* 185, 1033-1044.
- 780 51. Gonzales, N.M., Seo, J., Hernandez Cordero, A.I., St. Pierre, C.L., Gregory, J.S., Distler, M.G.,  
781 Abney, M., Canzar, S., Lionikas, A., and Palmer, A.A. (2018). Genome wide association  
782 analysis in a mouse advanced intercross line. *Nature Communications* 9, 5162.
- 783 52. Browning, Brian L., and Browning, Sharon R. (2016). Genotype Imputation with Millions of  
784 Reference Samples. *The American Journal of Human Genetics* 98, 116-126.
- 785 53. Nikolskiy, I., Conrad, D.F., Chun, S., Fay, J.C., Cheverud, J.M., and Lawson, H.A. (2015).  
786 Using whole-genome sequences of the LG/J and SM/J inbred mouse strains to prioritize  
787 quantitative trait genes and nucleotides. *BMC genomics* 16, 415.
- 788 54. Astle, W., and Balding, D.J. (2009). Population structure and cryptic relatedness in genetic  
789 association studies. *Statistical Science*, 451-471.
- 790 55. Price, A.L., Zaitlen, N.A., Reich, D., and Patterson, N. (2010). New approaches to population  
791 stratification in genome-wide association studies. *Nature Reviews Genetics* 11, 459-463.

- 792 56. Yang, J., Zaitlen, N.A., Goddard, M.E., Visscher, P.M., and Price, A.L. (2014). Advantages and  
793 pitfalls in the application of mixed-model association methods. *Nature genetics* 46, 100-  
794 106.
- 795 57. Yu, J., Pressoir, G., Briggs, W.H., Bi, I.V., Yamasaki, M., Doebley, J.F., McMullen, M.D., Gaut,  
796 B.S., Nielsen, D.M., and Holland, J.B. (2006). A unified mixed-model method for  
797 association mapping that accounts for multiple levels of relatedness. *Nature genetics* 38,  
798 203-208.
- 799 58. Zhou, X., and Stephens, M. (2012). Genome-wide efficient mixed-model analysis for  
800 association studies. *Nature Genetics* 44, 821-824.
- 801 59. Parker, C.C., Carbonetto, P., Sokoloff, G., Park, Y.J., Abney, M., and Palmer, A.A. (2014).  
802 High-resolution genetic mapping of complex traits from a combined analysis of F2 and  
803 advanced intercross mice. *Genetics* 198, 103-116.
- 804 60. Cheng, R., and Palmer, A.A. (2013). A simulation study of permutation, bootstrap, and gene  
805 dropping for assessing statistical significance in the case of unequal relatedness. *Genetics*  
806 193, 1015-1018.
- 807 61. Cheng, R., Parker, C.C., Abney, M., and Palmer, A.A. (2013). Practical considerations  
808 regarding the use of genotype and pedigree data to model relatedness in the context of  
809 genome-wide association studies. *G3 (Bethesda, Md)* 3, 1861-1867.
- 810 62. Speed, D., and Balding, D.J. (2015). Relatedness in the post-genomic era: is it still useful?  
811 *Nature Reviews Genetics* 16, 33-44.
- 812 63. Weir, B.S., Anderson, A.D., and Hepler, A.B. (2006). Genetic relatedness analysis: modern  
813 data and new challenges. *Nat Rev Genet* 7, 771-780.
- 814 64. Churchill, G.A., and Doerge, R.W. (1994). Empirical threshold values for quantitative trait  
815 mapping. *Genetics* 138, 963-971.
- 816 65. Broman, K.W., Wu, H., Sen, S., and Churchill, G.A. (2003). R/qtl: QTL mapping in experimental  
817 crosses. *Bioinformatics (Oxford, England)* 19, 889-890.
- 818 66. Manichaikul, A., Dupuis, J., Sen, S., and Broman, K.W. (2006). Poor performance of bootstrap  
819 confidence intervals for the location of a quantitative trait locus. *Genetics* 174, 481-489.
- 820 67. Dupuis, J., and Siegmund, D. (1999). Statistical methods for mapping quantitative trait loci from  
821 a dense set of markers. *Genetics* 151, 373-386.
- 822 68. Pfaffl, M.W. (2001). A new mathematical model for relative quantification in real-time RT-PCR.  
823 *Nucleic acids research* 29, e45-e45.
- 824 69. Schindelin, J., Arganda-Carreras, I., Frise, E., Kaynig, V., Longair, M., Pietzsch, T., Preibisch,  
825 S., Rueden, C., Saalfeld, S., Schmid, B., et al. (2012). Fiji: an open-source platform for  
826 biological-image analysis. *Nature Methods* 9, 676.
- 827 70. Arganda-Carreras, I., Fernández-González, R., Muñoz-Barrutia, A., and Ortiz-De-Solorzano, C.  
828 (2010). 3D reconstruction of histological sections: application to mammary gland tissue.  
829 *Microscopy research and technique* 73, 1019-1029.
- 830 71. Polder, G., Hovens, H., and Zweers, A. (2010). Measuring shoot length of submerged aquatic  
831 plants using graph analysis. In *Proceedings of the ImageJ User and Developer Conference*  
832 *2010, Mondorf-les-Bains, Luxembourg, 27-29 October 2010.* pp 172-177.
- 833 72. Adzhubei, I.A., Schmidt, S., Peshkin, L., Ramensky, V.E., Gerasimova, A., Bork, P.,  
834 Kondrashov, A.S., and Sunyaev, S.R. (2010). A method and server for predicting damaging  
835 missense mutations. *Nat Methods* 7, 248-249.
- 836 73. Rentzsch, P., Witten, D., Cooper, G.M., Shendure, J., and Kircher, M. (2019). CADD:  
837 predicting the deleteriousness of variants throughout the human genome. *Nucleic Acids*  
838 *Res* 47, D886-d894.
- 839 74. Ioannidis, N.M., Rothstein, J.H., Pejaver, V., Middha, S., McDonnell, S.K., Baheti, S., Musolf,  
840 A., Li, Q., Holzinger, E., Karyadi, D., et al. (2016). REVEL: An Ensemble Method for  
841 Predicting the Pathogenicity of Rare Missense Variants. *American journal of human*  
842 *genetics* 99, 877-885.
- 843 75. Gagliardi, A.D., Kuo, E.Y., Raulic, S., Wagner, G.F., and DiMattia, G.E. (2005). Human  
844 stanniocalcin-2 exhibits potent growth-suppressive properties in transgenic mice  
845 independently of growth hormone and IGFs. *American journal of physiology Endocrinology*  
846 *and metabolism* 288, E92-105.

- 847 76. Schneider, B.P., Lai, D., Shen, F., Jiang, G., Radovich, M., Li, L., Gardner, L., Miller, K.D.,  
848 O'Neill, A., Sparano, J.A., et al. (2016). Charcot-Marie-Tooth gene, SBF2, associated with  
849 taxane-induced peripheral neuropathy in African Americans. *Oncotarget* 7, 82244-82253.
- 850 77. Liu, X.G., Tan, L.J., Lei, S.F., Liu, Y.J., Shen, H., Wang, L., Yan, H., Guo, Y.F., Xiong, D.H.,  
851 Chen, X.D., et al. (2009). Genome-wide association and replication studies identified TRHR  
852 as an important gene for lean body mass. *American journal of human genetics* 84, 418-423.
- 853 78. Faulkner, J.A., Larkin, L.M., Claflin, D.R., and Brooks, S.V. (2007). Age-related changes in the  
854 structure and function of skeletal muscles. *Clinical and experimental pharmacology &*  
855 *physiology* 34, 1091-1096.
- 856 79. Marigorta, U.M., Rodríguez, J.A., Gibson, G., and Navarro, A. (2018). Replicability and  
857 Prediction: Lessons and Challenges from GWAS. *Trends in Genetics*.
- 858 80. Brocca, L., McPhee, J.S., Longa, E., Canepari, M., Seynnes, O., De Vito, G., Pellegrino, M.A.,  
859 Narici, M., and Bottinelli, R. (2017). Structure and function of human muscle fibres and  
860 muscle proteome in physically active older men. *The Journal of physiology* 595, 4823-4844.
- 861 81. Tomsig, J.L., and Creutz, C.E. (2002). Copines: a ubiquitous family of Ca<sup>2+</sup>-dependent  
862 phospholipid-binding proteins. *Cellular and Molecular Life Sciences CMLS* 59, 1467-1477.
- 863 82. Ishibashi, K., Miyamoto, K., Taketani, Y., Morita, K., Takeda, E., Sasaki, S., and Imai, M.  
864 (1998). Molecular cloning of a second human stanniocalcin homologue (STC2). *Biochem*  
865 *Biophys Res Commun* 250, 252-258.

866

## 867 Figure legends

868 Figure 1. Map of genome associations with the appendicular lean mass (ALM) of humans.

869 Genome wide association study (GWAS) on the ALM of middle-aged adults from the UK Biobank.

870 Significance level is presented on the vertical axis, while the chromosomal position of each genetic

871 marker is shown on the horizontal axis. Red line across the plot represents the genome wide

872 threshold of significance ( $P < 5 \times 10^{-8}$ ). This plot shows the association of variants with MAF >

873 0.001.

874

875 Figure 2. Genetic lean mass score affects the appendicular lean mass (ALM) in elderly humans.

876 The plot shows the ALM (kg) of the elderly cohort on the vertical axis. The elderly cohort was

877 ranked by genetic lean mass score and clustered in five quantiles (Q1 to Q5) (horizontal axis). The

878 average genetic lean mass score ( $\pm$  standard error) of each quantile is shown in parenthesis below

879 the horizontal axis. The overall quantile effect of the genetic lean mass score on ALM was tested

880 with Kruskal-Wallis test and the resulting  $P$  value is presented on the top of horizontal line above

881 the bars. The ALM median differences between the groups were tested using a Wilcoxon test; the

882 significance level of each comparison is presented above the horizontal lines with a holm adjusted

883  $P$  value.

884

885 Figure 3. Muscle weight QTLs identified in mice of the LGSM AIL and density plot of the  
886 genotypes. The circle plot (A) shows from the outer to the inner ring the GWAS of the TA, EDL,  
887 gastrocnemius and soleus muscle weights. Chromosomal position of each SNP is shown in the  
888 outer black circle of the plot; chromosome names are shown outside as “Chr”. Dots within each  
889 chromosome space represent the association ( $-\log_{10} P$  value) of each SNP tested. Dotted blue  
890 lines represent the genome-wide threshold ( $P < 6.45 \times 10^{-06}$ ) of significance, and red dots above  
891 the genome-wide threshold are significantly associated SNPs. (B) Plots of the allelic effect of the  
892 *Skmw34*, *Skmw55* and *Skmw46* QTLs on the EDL muscle mass. These QTLs were identified for  
893 the four muscles investigated. Vertical axis represents the residual muscle mass adjusted for sex,  
894 age, dissector and long bone length, and the horizontal axis shows the genotypes (LG/J  
895 homozygote, heterozygote and SM/J homozygote). Below the horizontal axis, the number of  
896 individuals with a given genotype is provided. The violin shapes within the plot area represents the  
897 distribution of individuals with the genotypes. Box whiskers represent minimum and maximum  
898 values distance between a whisker and the top or bottom of the box contains 25% of the  
899 distribution, the box captures 50% of the distribution, and the bold horizontal line represents the  
900 median. Pairwise comparison  $P$  value (t-test) is shown above horizontal lines at the top of the  
901 plots.

902

903 Figure 4. Gene knockdown effect on C2C12 myotube length.

904 This figure shows the gene knockdown effect of the *Cpne1*, *Sbf2* and *Stc2* genes on myotube  
905 length. The overall effect of the gene knockdown on myotube length was tested using ANOVA and  
906 the resulting  $P$  value was 0.00017 ( $F_{3, 34985} = 6.63$ ). Vertical axis represents the myotube length  
907 (quantile normalised) residuals (adjusted for area analysed and batch of cells), and the horizontal  
908 axis shows control and knockdown gene groups. Boxes represent the distribution of the myotube  
909 length for each group. Box whiskers represent minimum and maximum values within 1.5-fold  
910 interquartile range above the 75<sup>th</sup> percentile and below the 25<sup>th</sup> percentile; the box captures 50% of  
911 the distribution, and the bold horizontal line represents the median value of the myotube length

912 normalized residuals distribution for each knockdown group. Each red dot represents a single cell  
 913 culture sample for each knockdown group. Statistically significant t-test *P*-values between control  
 914 and knockdown genes are presented above horizontal lines. Effects without a statistically  
 915 significant difference between the control and gene knockdown are presented as “ns”. *Cpne1* and  
 916 *Stc2* knockdown groups were not different from each other ( $P > 0.05$ ). *Sbf2* gene knockdown  
 917 differed from *Cpne1* ( $P = 0.002$ ) and *Stc2* ( $P = 0.043$ ).

918

## 919 Tables

920 Table 1. Summary of the middle-aged cohort

| Trait              | N         | MIN    | MAX   | AVERAGE | SD    | SNP heritability ± SE |              |
|--------------------|-----------|--------|-------|---------|-------|-----------------------|--------------|
| ALM (kg)           | Females = | 51,238 | 11.80 | 41.60   | 20.02 | 2.61                  | 0.36 ± 0.003 |
|                    | Males =   | 43,996 | 15.30 | 54.50   | 30.00 | 3.99                  |              |
| Arm lean mass (kg) | Females = | 51,248 | 1.00  | 5.10    | 2.29  | 0.32                  | 0.32 ± 0.003 |
|                    | Males =   | 44,007 | 1.40  | 7.10    | 3.83  | 0.58                  |              |
| Leg lean mass (kg) | Females = | 51,258 | 4.50  | 16.60   | 7.76  | 1.00                  | 0.36 ± 0.003 |
|                    | Males =   | 44,020 | 6.20  | 20.00   | 11.25 | 1.43                  |              |
| Leg (cm)           | Females = | 51,228 | 36.00 | 113.00  | 76.56 | 4.33                  | 0.59 ± 0.010 |
|                    | Males =   | 43,967 | 40.00 | 122.00  | 83.80 | 4.73                  |              |
| WBF (kg)           | Females = | 51,239 | 5.00  | 109.80  | 25.68 | 10.70                 | 0.33 ± 0.006 |
|                    | Males =   | 43,793 | 5.00  | 88.50   | 21.08 | 8.24                  |              |

921 Column description from left to right: 1) Trait, 2) Number of records, 3) Minimum value within the  
 922 distribution of each trait, 4) Maximum value within the distribution of each trait, 5) Average value of  
 923 each trait, 6) Standard deviation, 7) SNP heritability of the ALM across sex. All summary statistic  
 924 values were calculated for each sex group. ALM: appendicular lean mass. WBF: whole body fat.

925

926 Table 2. Summary of the LGSM AIL muscle traits

| Trait   | N         | MIN   | MAX   | AVERAGE | SD    | SNP heritability ± SE |             |
|---------|-----------|-------|-------|---------|-------|-----------------------|-------------|
| TA (mg) | Females = | 675   | 26.60 | 57.20   | 42.22 | 5.34                  | 0.39 ± 0.03 |
|         | Males =   | 1,186 | 31.60 | 70.80   | 50.11 | 6.73                  |             |



|                    |           |       |       |        |        |       |             |
|--------------------|-----------|-------|-------|--------|--------|-------|-------------|
| EDL (mg)           | Females = | 675   | 4.60  | 10.40  | 7.52   | 0.94  | 0.42 ± 0.03 |
|                    | Males =   | 1,184 | 5.90  | 13.30  | 9.31   | 1.30  |             |
| Gastrocnemius (mg) | Females = | 675   | 64.00 | 133.00 | 93.15  | 10.68 | 0.31 ± 0.03 |
|                    | Males =   | 1,187 | 70.20 | 174.90 | 119.32 | 16.32 |             |
| Soleus (mg)        | Females = | 671   | 3.20  | 10.30  | 6.34   | 1.18  | 0.30 ± 0.03 |
|                    | Males =   | 1,187 | 4.00  | 13.50  | 7.78   | 1.64  |             |

927 

---

 Column description from left to right: 1) Trait, 2) Number of records, 3) Minimum value within the  
928 distribution of each trait, 4) Maximum value within the distribution of each trait, 5) Average or mean  
929 value of each trait distribution, 6) Standard deviation of the mean, 7) SNP heritability for each trait  
930 across sex. Summary statistic values were calculated for each sex group.

931 Table 3. Syntenic regions between human and mouse QTLs and positional candidate genes

| Human locus peak pos | Mouse QTL peak pos (syntenic to human) | Elderly cohort <i>P</i> | Gene symbol    | Human gene name                                          | Differential expression in mouse Soleus | Differential expression in mouse TA |
|----------------------|----------------------------------------|-------------------------|----------------|----------------------------------------------------------|-----------------------------------------|-------------------------------------|
| 5:64602788           | 13:104435003                           | n/a                     | <i>ADAMTS6</i> | ADAM metallopeptidase with thrombospondin type 1 motif 6 | 0.440                                   | 0.641                               |
| 5:172755066          | 11:31680504                            | 9.00×10 <sup>-11</sup>  | <i>STC2</i>    | stanniocalcin 2                                          | 0.969                                   | 0.981                               |
| 6:32038550           | 17:34968724                            | 1.90×10 <sup>-10</sup>  | <i>STK19</i>   | serine/threonine kinase 19                               | 0.432                                   | 0.319                               |
|                      |                                        |                         | <i>TNXB</i>    | tenascin XB                                              | 0.630                                   | 0.541                               |
| 9:119309525          | 4:65415188                             | 1.70×10 <sup>-08</sup>  | <i>PAPPA</i>   | pappalysin 1                                             | n/a                                     | 0.893                               |
|                      |                                        |                         | <i>ASTN2</i>   | astrotactin 2                                            | 0.014                                   | 0.745                               |
| 11:10303939          | 7:110986447                            | 3.50×10 <sup>-19</sup>  | <i>SBF2</i>    | SET binding factor 2                                     | 0.762                                   | 0.893                               |
|                      |                                        |                         | <i>ADM</i>     | adrenomedullin                                           | n/a                                     | 0.280                               |
|                      |                                        |                         | <i>AMPD3</i>   | adenosine monophosphate deaminase 3                      | 0.064                                   | 0.110                               |

932 Column description from left to right: 1) ALM Human locus peak position as “chromosome: base pair position”, 2) LGSM QTL peak position as  
933 “chromosome: base pair position” (syntenic to human), 3) Elderly cohort *P* value, 4) Human gene symbol, 5) Human gene name, 6) Adjusted *P* value  
934 of differential expression between the soleus muscle of the LG/J and SM/J mouse strains<sup>24</sup>, 7) Adjusted *P* value of differential expression between the  
935 TA muscle of the LG/J and SM/J mouse strains<sup>24</sup>



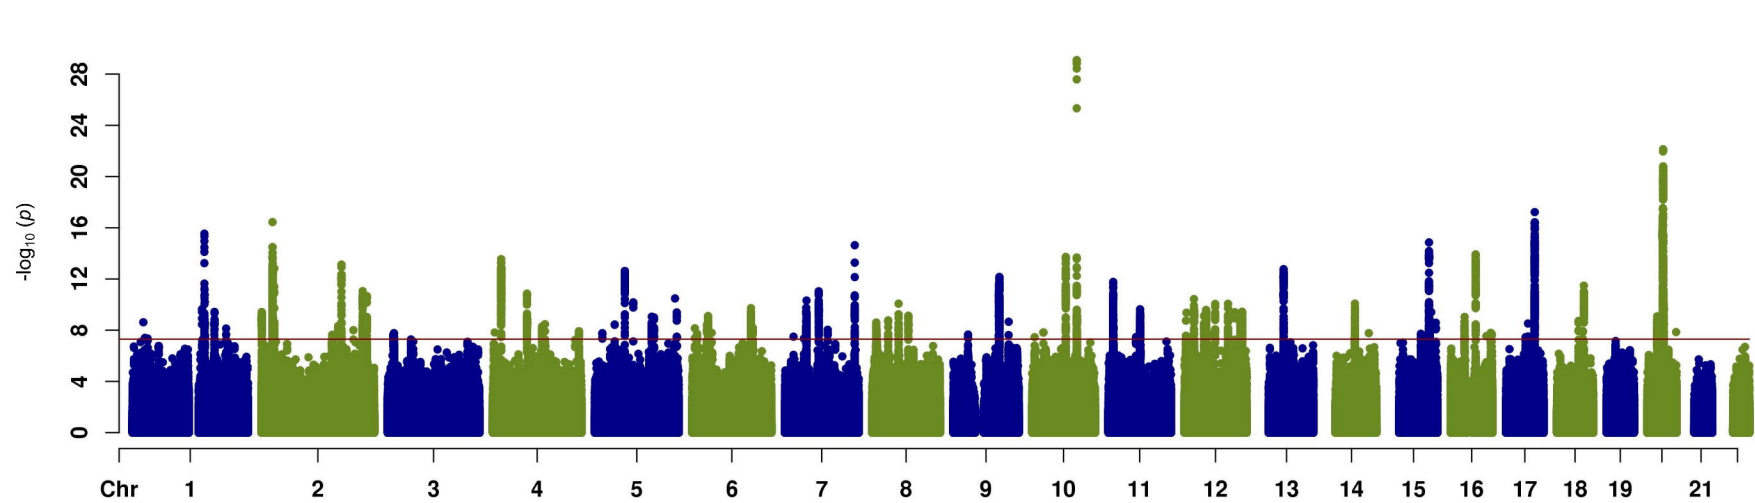

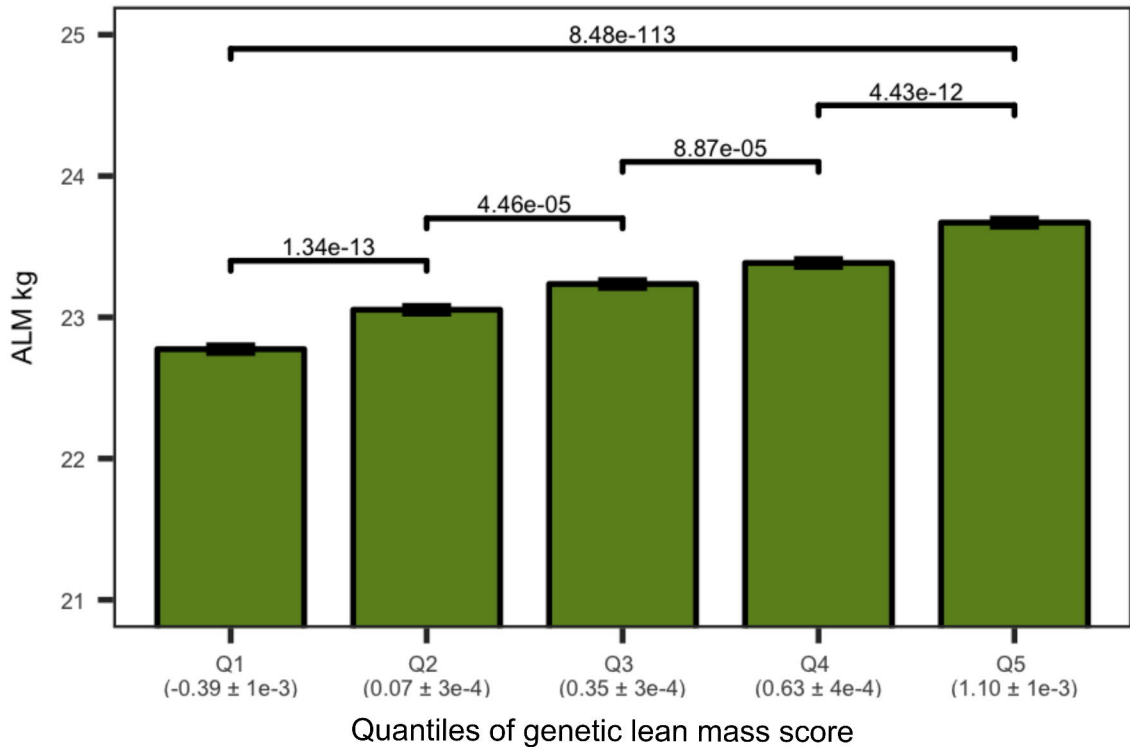

A

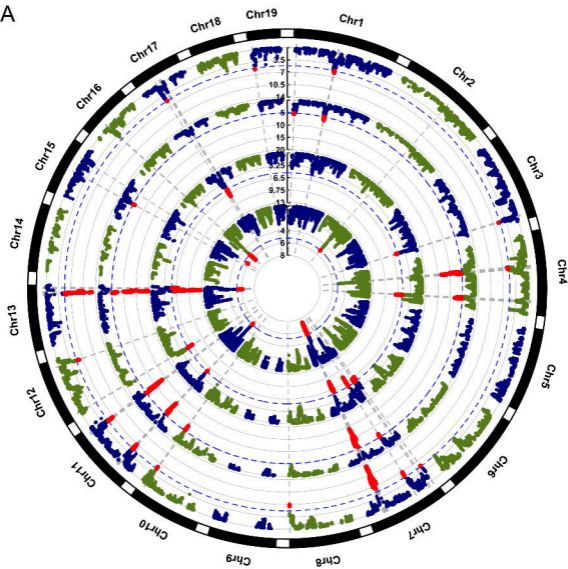

B

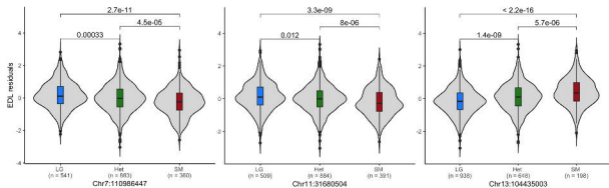

**Myotube length normalised residuals**

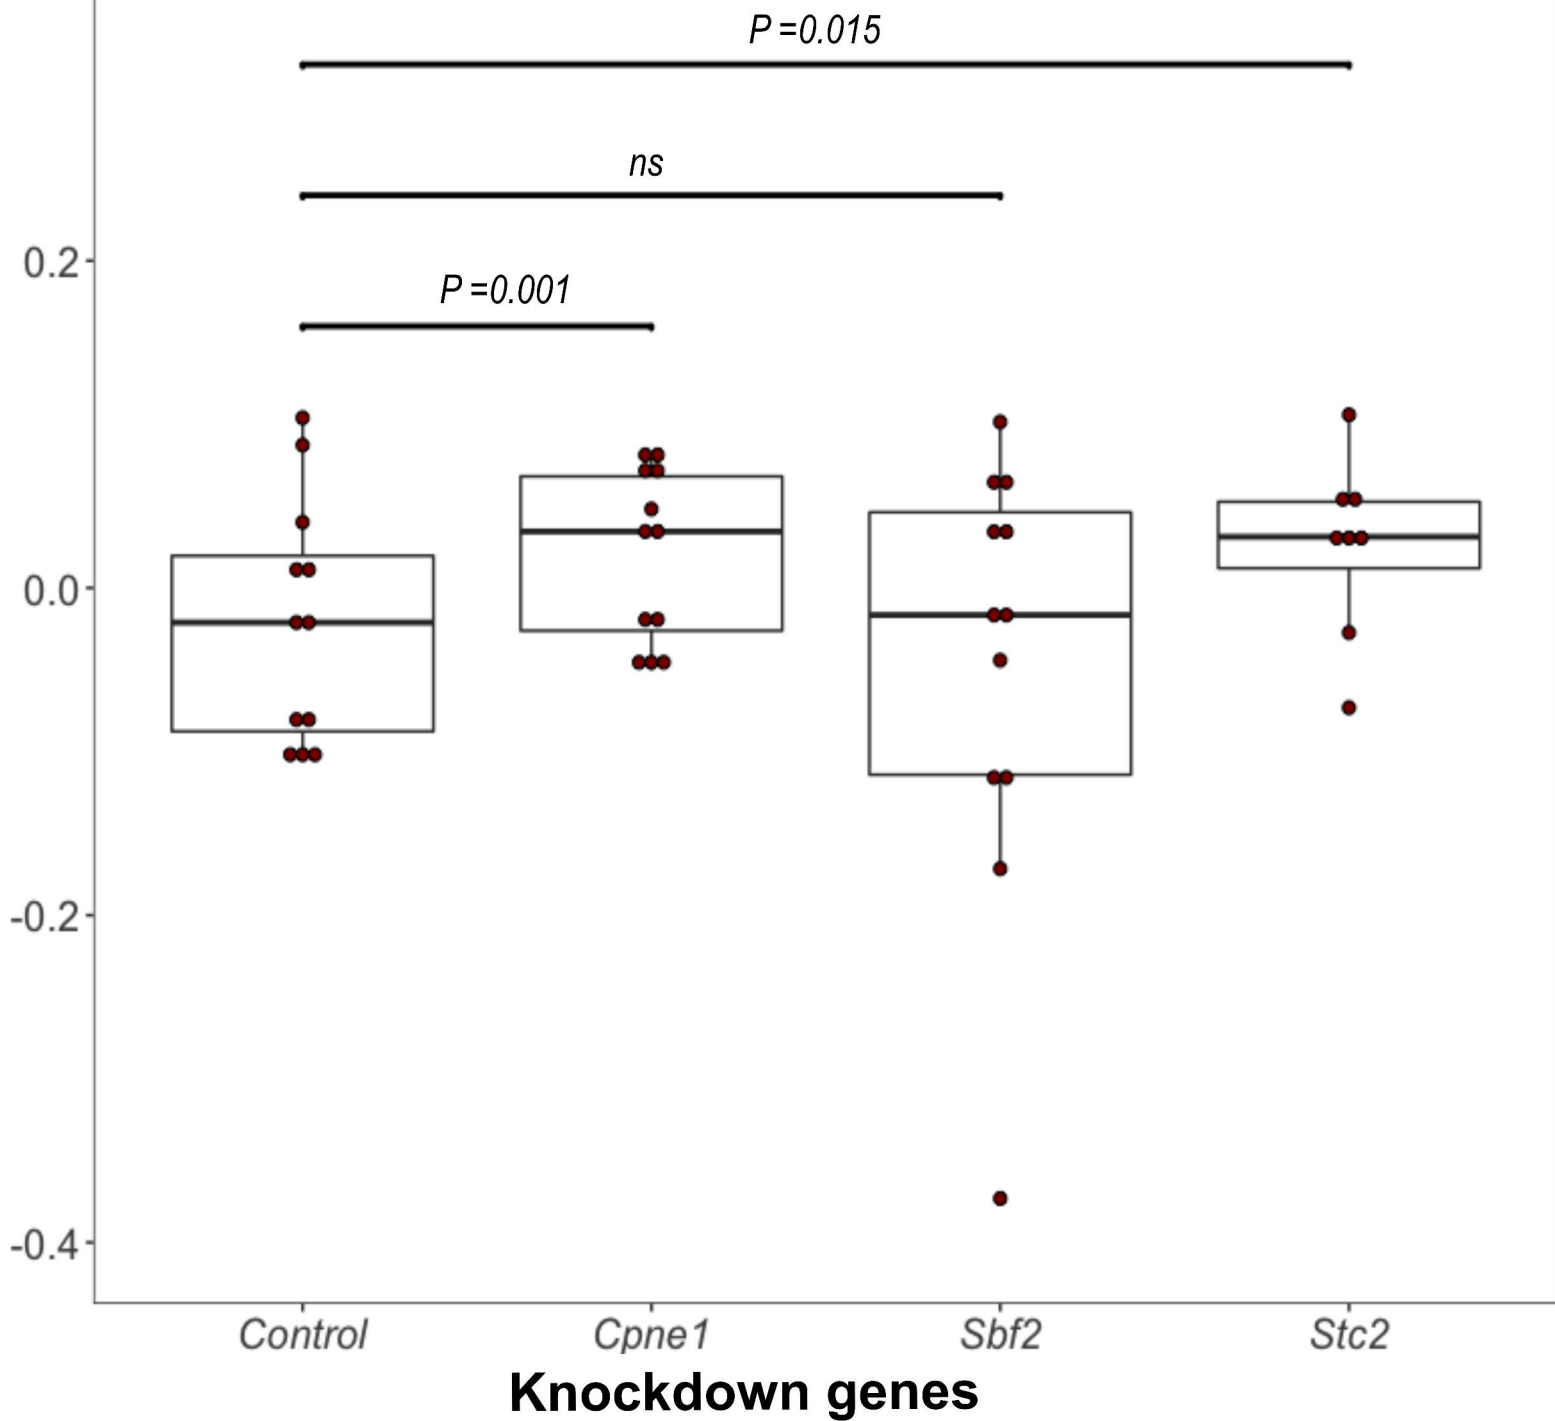

Source: https://www.biorxiv.org/content/10.1101/370312v2.full.pdf
